## Title

Shifts in the thermal niche of fruit trees under climate change: the case of peach cultivation in France.

## Authors

C. Vanalli<sup>1,2,3</sup>, R. Casagrandi<sup>2</sup>, M. Gatto<sup>2</sup>, D. Bevacqua<sup>3\*</sup>

<sup>1</sup> Center for Infectious Disease Dynamics and Department of Biology, The Pennsylvania State University, University Park, 16802 PA, USA

<sup>2</sup> Dipartimento di Elettronica, Informazione e Bioingegneria, Politecnico di Milano, 20133 Milano, Italy

<sup>3</sup> Plantes et Système de cultures Horticoles (PSH), UR 1115, INRAE, 84000, Avignon, France

\* **Corresponding author** [daniele.bevacqua@inrae.fr](mailto:daniele.bevacqua@inrae.fr)

## Abstract

Climate influences plant phenological traits, thus playing a key role in defining the geographical range of crops. Foreseeing the impact of climate change on fruit trees is essential to inform policy decisions to guide the adaptation to new climatic conditions. To this end, we propose and use a phenological process-based model to assess the impacts of climate change upon the phenology, the suitability and the distribution of economically important cultivars of peach (*Prunus persica*), across the entire continental France. The model combines temperature dependent sub-models of dormancy, blooming, fruit survival and ripening, using chilling units, forcing units, frost occurrence and growing degree days, respectively. We find that climate change will have divergent impacts upon peach production. On the one hand, blooming will occur earlier, warmer temperatures will decrease spring frost occurrence and fruit ripening will be easily achieved before the start of fall. On the other hand, milder winters will impede the plant buds from breaking endodormancy, with consequent abnormal patterns of fruit development or even blooming failure. This latter impact will dramatically shift the geographic range of sites where peach production will be profitable. This shift will mainly be from the south

of France (Languedoc-Roussillon, Rhône-Alpes and Provence-Alpes-Côte d'Azur), to north-western areas where the winter chilling requirement will still be fulfilled. Our study provides novel insights for understanding and forecasting climate change impacts on peach phenology and it is the first framework that maps the ecological thermal niche of peach at national level.

**Key words:** Process-based suitability model; global warming; blooming time; plant dormancy; peach (*Prunus persica*); plant phenology

## 1 Introduction

Climate plays a key role in defining the geographic range of plants (Whittaker, 1975) and climate change is expected to severely influence plant distributions in the forthcoming decades (Lenoir et al., 2008; Morin et al., 2008; Chuine, 2010; Gritti et al., 2013; Zhao et al., 2018). Plant phenology is strongly responsive to temperature and, indeed, phenological changes have been among the first documented fingerprints of climate change (Menzel & Fabian, 1999; Körner & Basler, 2010; Lee et al., 2013; Wolkovich et al., 2017). Climate change will therefore have an impact on agricultural production by altering the geographical distribution of economically important crops (Tao et al., 2006; Duchêne et al., 2010; Teixeira et al., 2011; Ghrab et al., 2014). Foreseeing this impact is essential to alert stake holders, inform decisions to implement adaptation strategies and to alleviate damaging consequences. Although some of the impacts can be mitigated in agricultural settings (e.g. irrigation, frost protection), the challenge will be greater for perennial crops. These are subject to climate impacts throughout the year and their decades-long lifespan makes the choice of where to plant an orchard critical (Lobell & Field, 2012).

To date, spatial shifts in the distribution of crops have been assessed using empirical Species Distribution Models (SDMs) (Machovina & Feeley, 2013), as well as process-based Suitability Models (SMs) (e.g. White et al., 2006; Keenan et al., 2011). Both modeling frameworks have merits and shortcomings. However, as noticed by Parker and Abatzoglou (2017), “unlike SDMs, SMs can provide information on specific climatic limitations and crop phenology, and are not limited by the correlative approach”. When dealing with perennial plant phenology and climate, the blooming process is probably the most studied. Until one decade ago, most studies

23 provided consensus on the earlier occurrence of plant blooming. For example, Estrella et al.  
24 (2007) reported that phenological events such as emergence and blooming “are significantly  
25 earlier now than 53 years ago, with a mean advance of 1.1-1.3 days per decade”. According to  
26 Chmielewski et al. (2004) “phenological phases of the natural vegetation as well as of fruit trees  
27 and field crops have advanced clearly in the last decade of the 20<sup>th</sup> century”. Nevertheless, in the  
28 last years some authors theorized a possible trend reversal due to a subtle, process-dependent  
29 cause: strong warming in winter could slow the fulfillment of chilling requirements, which may  
30 delay spring phenology (Hänninen & Tanino, 2011). These scenarios were also confirmed in  
31 recent field studies (Yu et al., 2010; Laube et al., 2014). Accordingly, models that explicitly  
32 considered the fulfillment of both chilling and forcing requirements, also called two-phase or  
33 sequential Chilling/Forcing (CF) models, were proposed to better assess the date of blooming.  
34 For the genus *Prunus*, this has been accomplished for apricot and peach trees (Chuine et al.,  
35 2016) as well for cherry trees (Chmielewski & Götz, 2016).

36 To design adaptation strategies, the occurrence of blooming is a necessary yet not sufficient  
37 condition to make an area suitable for fruit production. An area is considered suitable if the  
38 environmental conditions allow all the processes leading to full fruit ripeness to occur. Follow-  
39 ing this rationale, Parker and Abatzoglou (2017) assessed possible shifts in the thermal niche of  
40 almond trees under climate change in the Western United States. Santos et al. (2016) assessed  
41 values of chilling and heat accumulation over Portugal and discussed possible related shifts  
42 of the thermal niche of several fruit classes (from carob to lemons and from olives to vines).  
43 Similarly, Ahmadi and Baaghdeh (2018) assessed the impact of climate change on apple tree  
44 cultivation in Iran. They assumed that a given area would be suitable if temperatures remained  
45 within certain boundaries in any plant development stage.

46 Here, we propose a novel modeling approach that combines temperature-dependent phenologi-  
47 cal models of blooming, fruit survival and ripening to assess suitability for peach *Prunus persica*  
48 tree cultivation. We optimize the models for nine different peach cultivars and demonstrate  
49 our approach for a reference past period (1996-2015). Then, we use it to project shifts in the  
50 peach cultivation range in continental France under different scenarios, that are Representa-  
51 tive Concentration Pathways, RCPs 4.5 and 8.5 (IPCC, 2013) of average and minimum daily  
52 temperature change in the near (2021-2040) and far (2081-2100) future. Globally, the peach is

53 the third most cultivated plant of the *Rosaceae* family (Obi et al., 2018). This fruit has been  
54 extensively studied in both field and modeling works (Génard & Huguet, 1996; Ziosi et al.,  
55 2003; Allen et al., 2006; Miras-Avalos et al., 2011) and its sensitivity to climate change has  
56 already been established (Litschmann et al., 2008; Ghrab et al., 2014). The French territory  
57 is a paradigmatic case for studying peach cultivation, because it covers four climatic zones  
58 (Mediterranean, continental, oceanic and mountain) in less than 600,000 km<sup>2</sup>.

## 59 **2 Materials and Methods**

### 60 **2.1 Phenological dates**

61 From the database TEMPO (National Network of Phenology Observatories) (INRA, Seguin,  
62 2004), we obtained 159 pairs of data that report blooming and harvest dates for nine peach  
63 cultivars (Snowqueen, M. Sundance, Springlady, OHenry, Alexandra, Flavorglod, Benedicte,  
64 Flavorcrest and Emeraude) in the period 1987-2008. These concern three experimental sites in  
65 southern France: Bordeaux (long. 0° 34' W, lat. 44° 46' N), Balandran (long. 4° 28' E, lat.  
66 43° 45' N) and Étoile-sur-Rhône (long 4° 53' E, lat. 44° 49' N) (see Supplementary Information  
67 Figure S1).

### 68 **2.2 Temperature: records, assessments and projections**

69 Daily average temperature data (1987-2008) were obtained from meteorological stations in the  
70 proximity of the experimental sites (see Supplementary Information Table S1) and provided  
71 by the INRA CLIMATIK platform ([https://intranet.inra.fr/climatik\\_v2](https://intranet.inra.fr/climatik_v2)). We obtained assess-  
72 ments of daily minimum and average temperatures for the entire French continental area for  
73 the period 1996-2015. Assessments were generated by the EUROCORDEX CNRM-CERFACS  
74 CM5 model and downscaled with a spatial resolution of around 8 × 8 km<sup>2</sup> (~ 0.11° × 0.11°).  
75 They have been made available by the project Drias developed by Météo-France (Drias, 2013).  
76 The same project provided projections of the daily minimum and average temperature for two  
77 Representative Concentration Pathways scenarios, RCP 4.5 and RCP 8.5 (IPCC, 2013), in the  
78 period 2020-2100, downscaled at the same spatial resolution, for the entire French territory.  
79 The RCPs refer to different emission scenarios providing an estimated increase of global mean

80 surface temperatures at the end of the 21<sup>st</sup> century, is likely to be in the ranges of 1.1-2.6°C  
81 for RCP 4.5 and 2.6-4.8°C for RCP 8.5. To analyze the extent of climate warming in France,  
82 we selected four cells of  $24 \times 24$  km<sup>2</sup>, one for each climatic zone (Mediterranean, continental,  
83 oceanic and mountain), and we evaluated the daily temperature anomalies in the the near  
84 (2021-2040) and far (2081-2100) future with respect to a reference time period (1996-2015).

### 85 **2.3 A model to predict blooming date**

86 First, we performed a 1-way ANalysis Of VAriance (ANOVA, with a significance level of  
87  $\alpha = 0.05$ ) to test if observed blooming dates significantly differed between the nine consid-  
88 ered cultivars. Second, we used the two-phases model proposed by Chuine et al. (2016) to  
89 predict blooming dates. That model assumes that endodormancy break occurs at the time  $t_C$ ,  
90 when the state of chilling  $S_c(t)$ , resulting from the sum of the daily rates of chilling  $R_c$  (as  
91 detailed below, see eq. 5), reaches the critical value  $C^*$ . According to Chuine et al. (2016),  
92 thus, we compute

$$S_c(t) = \sum_{\xi=t_0}^t R_c(\xi) \quad (1)$$

$$S_c(t_C) = C^* \quad (2)$$

93 with  $t$  measured in days and  $t_0$  fixed to September 1<sup>st</sup>. Blooming is assumed to occur at time  
94  $t_B$  when the state of forcing  $S_f$ , *i.e.* the sum of the daily rates of forcing  $R_f$  (also detailed  
95 below, see eq. 6), reaches the critical value  $F^*$ . According to Chuine et al. (2016), we have

$$S_f(t) = \sum_{\xi=t_c}^t R_f(\xi) \quad (3)$$

96

$$S_f(t_B) = F^* \quad (4)$$

97 with  $t_C$  determined by equation 2. Note that the endodormancy break is a necessary condition  
98 to enter the ecodormancy phase that precedes blooming. Both daily rates of chilling  $R_c$  and  
99 forcing  $R_f$  are functions of the average daily temperature  $T(t)$ , itself varying with time  $t$ . We

100 computed  $R_c$  using a symmetrical and unimodal function proposed by Chuine (2000):

$$R_c(T(t)) = \frac{1}{1 + \exp [a(T(t) - T_c)^2 + b(T(t) - T_c)]} \quad (5)$$

101 where  $a$  (in units of  $^{\circ}\text{C}^{-2}$ ),  $b$  ( $^{\circ}\text{C}^{-1}$ ) and  $T_c$  ( $^{\circ}\text{C}$ ) are species-specific parameters that describe  
102 the accumulation of chilling units. According to Chuine et al. (2016), we computed  $R_f$  as a  
103 logistic function of temperature:

$$R_f(T(t)) = \frac{1}{1 + \exp [s(T(t) - T_f)]} \quad (6)$$

104 where the parameter  $s$  ( $^{\circ}\text{C}^{-1}$ ) shapes the steepness of the curve and  $T_f$  ( $^{\circ}\text{C}$ ) the logistic midpoint.  
105 As for the chilling function, we used the parameters optimized by Chuine et al. (2016) for peach  
106 ( $a = 3.53$ ,  $b = -25.85$ ,  $T_c = 1.52$ ,  $C^* = 49.6$ ), while we optimized the parameters of the forcing  
107 function, *i. e.*  $s$ ,  $T_f$  and the required  $F^*$ , using our data set by minimizing the Root Mean  
108 Square Error ( $RMSE$ , see Burnham and Anderson, 2002):

$$RMSE = \sqrt{\frac{\sum_{i=1}^n (\hat{x}_i - \bar{x}_i)^2}{n}} \quad (7)$$

109 where  $\hat{x}_i = \hat{t}_{Bi}$  is the estimated blooming date,  $\bar{x}_i = \bar{t}_{Bi}$  is the observed one, and  $n$  the number  
110 of observations over three different sites. We performed the  $RMSE$  minimization via the  
111 Nelder–Mead simplex algorithm (Lagarias et al., 1998), using the built-in MATLAB optimizer  
112 “fminsearch”.

## 113 2.4 A model to predict ripening duration

114 We performed a 1-way ANalysis Of VAriance (ANOVA, with a significance level of  $\alpha = 0.05$ )  
115 to test if the observed ripening duration  $d_R$  (*i.e.* the time from blooming =  $t_B$  to ripening  
116 =  $t_R$ ) was significantly affected by the factor “cultivar”. In case of significance, we performed  
117 a multiple t-test using Scheffé’s procedure (Savin, 1980), with a significance level  $\alpha = 0.05$ , to  
118 evaluate if cultivars could be classified in groups. If this was the case, we calibrated a different  
119 parameter set of the ripening model for each group (see below). We assume that a fruit is ripe  
120 when the state of ripening  $S_R$ , *i.e.* the sum of the daily rates of heating  $R_R$  (see eq. 10 below),

121 reaches the critical value  $R^*$  (Miller et al., 2001; Kenealy et al., 2015):

$$S_R(t) = \sum_{\xi=t_B}^t R_R(\xi) \quad (8)$$

122

$$S_R(t_R) = R^* \quad (9)$$

123 where  $t_B$  is the observed blooming time for each cultivar and year.  $R_R(t)$  is calculated as

$$R_R(t) = \begin{cases} T(t) - T_a & \text{if } T(t) \geq T_a \\ 0 & \text{if } T(t) < T_a \end{cases} \quad (10)$$

124 where  $T_a$  is the base activation temperature, which we set equal to 7°C (Miller et al., 2001;  
125 Kenealy et al., 2015). Thus,  $R^*$  is the sum of Growing Degree Days (GDD). Then, for each  
126 cultivar group we estimated the value of  $R^*$  minimizing the  $RMSE$  (see eq. 7), where  $\hat{x}_i = \hat{d}_{Ri}$   
127 is the estimated ripening duration,  $\bar{x}_i = \bar{d}_{Ri}$  is the observed one, and  $n$  is the number of  
128 observations. If ripening is not achieved by the 21<sup>st</sup> of September, when the plant is assumed  
129 to enter dormancy (Battey, 2000; Gauzere et al., 2017), the yield is considered to be entirely  
130 lost. In other words, the environmental conditions are not suitable for cultivation.

## 131 2.5 Thermal niche for fruit tree cultivation

132 We assume that an area is suitable for peach cultivar if all three necessary conditions are  
133 sequentially met: *i*) blooming can occur, *i.e.* both chilling and forcing requirements are satisfied;  
134 *ii*) no frost events occur at the turn of blooming; and *iii*) ripening can occur. To model the fact  
135 that flowers (considered here as newborn fruits) are sensitive to frost in their first week after  
136 blossom (Rodrigo, 2000), we assume that fruits do not survive if there is at least one day, in the  
137 period from  $t_B - 3$  to  $t_B + 3$ , with minimum daily temperature below a critical temperature ( $T_x$ ).  
138 For peach, according to Snyder and Melo-Abreu (2005), this critical temperature corresponds  
139 to -4.9 °C. We assumed that orchards can be irrigated so that water requirements are met  
140 independently from climatic conditions. We assessed the spatial suitability for different varieties  
141 of peach cultivation across France (8412 map cells of 8×8 km<sup>2</sup>) over three different periods,  
142 *i.e.* a reference (1996-2015), a near future (2031-2050) and a far future (2081-2100) period.

143 We considered a map cell as suited for cultivation if all three conditions described above are  
144 accomplished for at least 18 years out of 20.

### 145 3 Results

#### 146 3.1 Models for blooming and ripening date

147 We found that the factor “cultivar” has no significant effect on the observed blooming dates  
148 ( $p = 0.61$ ). The values of parameters of the blooming model optimized against our data set,  
149 namely  $s$ ,  $T_f$  and  $F^*$  (see eq. 5), are  $-0.5 \text{ }^\circ\text{C}^{-1}$ ,  $14.4 \text{ }^\circ\text{C}$  and  $4.19$ , respectively. Although  
150 the model is quite hyperactive, *i.e.* it tends to underestimate earliest blooming dates and to  
151 overestimate the latest ones, it reproduces the observed data well (Figure 1a). We evaluated  
152 if the model residuals are cultivar-dependent via an ANOVA and the resulting p-value of  $0.65$   
153 suggests that the model simulates the peach blooming time in an equivalent way for all the  
different cultivars.

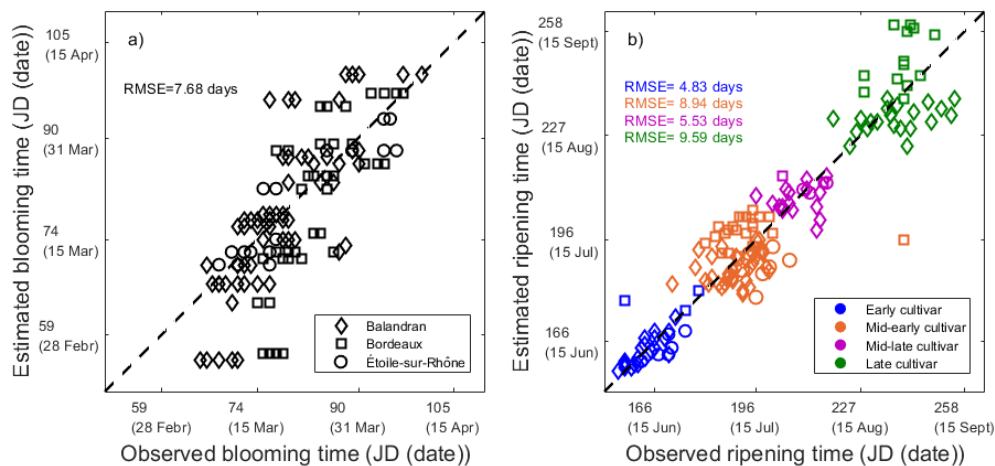

154  
155 *Figure 1: Blooming and ripening dates. Observed (x-axis) vs predicted (y-axis) dates in Julian Day (JD) and in calendar dates (within brackets) of (caption a) blooming and (caption b) ripening. Diamonds, squares and circles refer to the sites of Balandran, Bordeaux and Étoile-sur-Rhône, respectively. Ripening date is represented in blue for early, in orange for mid-early, in purple for mid-late and in green for late cultivars.*



156 observed ripening duration ( $p < 0.01$ ). We therefore refined the analysis for the ripening dura-  
157 tion applying Scheffé's procedure and performing a multiple t-test (Figure S2). The procedure  
158 identified four cultivar clusters that we can name: "early cultivar" (Alexandra and Springlady),  
159 "mid-early cultivar" (Snowqueen, Flavorgold, Flavorcrest and Emeraude), "mid-late cultivar"  
160 (Benedicte) and "late cultivar" (M.Sundance and OHenry). We then optimized the parameter  
161 of forcing requirement Growing Degree Days for each cultivar clustering, obtaining a GDD  
162 value equal to 678, 1026, 1371 and 1772, respectively, for the "early", "mid-early", "mid-late"  
163 and "late" cultivars. Adherence of model predictions (y-axis) to observations (x-axis), using  
164 our model with calibrated parameters for each cluster, is quite satisfactory, as shown in Fig-  
165 ure 1b. We also evaluated how the error in the estimate of blooming time propagates to the  
166 ripening period duration. We used the estimated blooming time as initial time for the ripening  
167 time model and we compared the estimated ripening period duration with the observed data  
168 (Figure S3). Our analysis reveals that the predicted date of ripening does not vary significantly  
169 whether we used the described model (estimated) or the observed blooming date (early cultivar  
170  $p= 0.95$ , mid-early cultivar  $p= 0.44$ , mid-late cultivar  $p= 0.24$  and late cultivar  $p= 0.87$ ).

### 171 **3.2 Peach thermal niche in the reference period 1996-2015**

172 Average temperature conditions over the reference period for the four considered cells repre-  
173 sentative of climatic zones are reported in the Supporting Information (Figure S4a-d and Table  
174 S2). Spring temperatures are warmer in the Mediterranean region [12-15 °C], with respect to  
175 those in the continental and oceanic regions [10-12 °C], which are comparable between them,  
176 while they are lower in the mountain areas [4-5 °C]. Similarly, the warmest summers were regis-  
177 tered in the Mediterranean region [20-22 °C], the coldest ones in the mountain areas [12-16 °C]  
178 and intermediate summers were found in oceanic and continental regions, where temperatures  
179 are more variable. Autumns and winters were characterized by milder temperatures in the  
180 Mediterranean [9-11 °C and 3-7 °C] and oceanic regions [8-12 °C and 4-7 °C].

181 As mapped in Figure 2a, our process-based suitability model estimates that for the reference  
182 period 1996-2015 the chilling requirement was achieved first (by the end of December) in the  
183 mountain regions (Alps, Pyrenees and in the Massif Central) and last (by mid February) in  
184 the Mediterranean and the Southern Atlantic (MSA) regions. Also, in a few map cells of these

185 regions (notably, nearby the cities of Montpellier, Touloun, Sain Tropez, Perpignan et Bayonne)  
186 some winters were so mild that the chilling requirement was not satisfied and the endodormancy  
187 break was compromised. In contrast, blooming time (Figure 2b) occurred late (by end of April)  
188 in the mountain regions and first (by mid March) in the MSA regions. This occurs because  
189 in mountain regions, although the plants achieve chilling requirement first, they experience  
190 high temperatures triggering forcing rates much later in the season. Likewise, in some cells of  
191 mountain regions (Prealps and Massif Central), blooming was not effective because newborn  
192 fruits were injured by frost. Note that this was not the case for map cells at the highest  
193 altitudes where blooming occurred late enough to avoid frosting days. When considering the  
194 date of ripening (Figure 2c), a mid-early cultivar, which is expected to ripe around mid July  
195 in the MSA regions, has no time to ripe in the mountain regions. In the northern part of the  
196 country, instead, ripeness is achieved only at the end of August. Such a difference in the date of  
197 ripening is mostly due to blooming occurring later, rather than to lower summer temperatures.  
198 Mid-late and late cultivars need significantly more days to attain ripeness, so they can only be  
199 cultivated in those regions where blooming occurs first (Figure S5). For this reason, in terms  
200 of peach suitability (Figure 2d), the MSA regions were the most suited for peach cultivation,  
201 as both early to late cultivars could be grown and produce peach from mid June to the end of  
202 August. On the other hand, the mountain regions (Pyrenees, Massif Central and Alps, black  
203 in Figure 2d) were the only regions where no peach variety could be cultivated due to spring  
204 frost damages, late blooming and the consequent lack of time to attain ripeness.

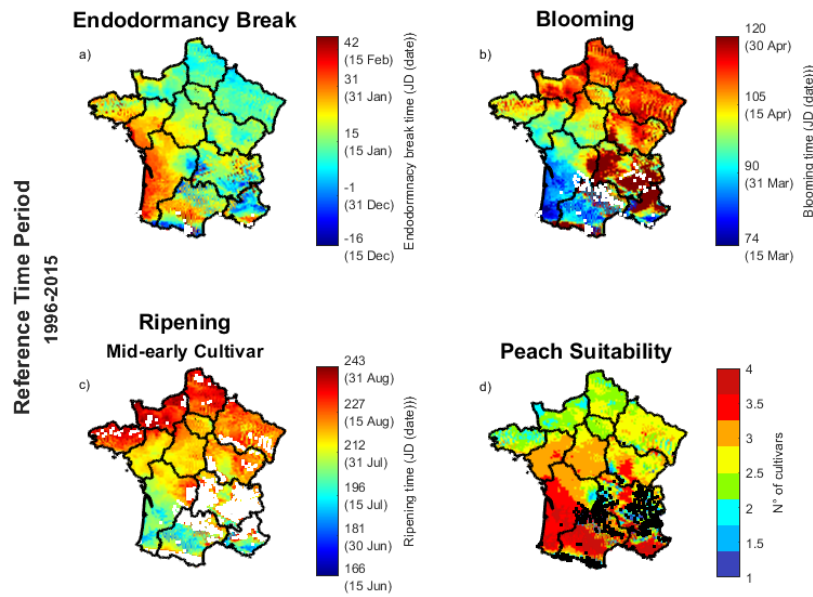

Figure 2: Peach phenological times and thermal niche for cultivation: hindcast in the French continental regions for the reference period (1996-2015). (a) Endodormancy break, (b) blooming, (c) ripening of mid early cultivars dates, in Julian Days and calendar dates (within brackets), and (d) peach suitability. For each map cell ( $8 \times 8$  km<sup>2</sup>), the average value over the considered 20 years is reported. White map cells (in captions a, b and c) represent those areas where the phenological event did not occur for at least two years. Likewise, black cells (in caption d) represent those areas where no peach cultivar could be cultivated for at least two years (out of 20).

### 205 3.3 Peach thermal niche in the future

206 According to the used scenarios (Figure S4 and Table S2), climate warming is expected to  
 207 be more severe in the Mediterranean and mountain regions. Particularly, with the highest  
 208 anomalies expected in winters for the Mediterranean regions, and in both summer and winters  
 209 for the mountain areas. In the near future (2021-2040), the RCP 4.5 and RCP 8.5 scenarios are  
 210 characterized by similar temperature anomalies. It is worthy to note that, for that period higher  
 211 winter anomalies are generally expected for RCP 4.5 rather than for RCP 8.5. Conversely, in the  
 212 far future (2081-2100), RCP 8.5 anomalies are expected to be consistently higher throughout  
 213 the year, with the highest predicted warming in the mountain areas in summer (up to +5.1 °C).

214 Our mapping in Figure 3 reveals that the most suitable areas for peach cultivation in France  
 215 are expected to significantly change in the near future (Figure 3a-d) and even more at the end  
 216 of the century (Figure 3e-h). Some of the historically suitable zones in the MSA regions are  
 217 predicted to become unsuitable because of blooming failure, being the chilling requirement

218 impossible to achieve (Figure 3a,e). In those areas where the chilling requirement will still be  
219 satisfied, endodormancy break will be delayed. However, this will not directly reflect into a  
220 delayed blooming time, as the forcing requirement will be achieved more quickly. This earlier  
221 achievement of the forcing requirement will cause blooming time to occur 7-17 days in advance  
222 (Figure 3b,f). In other words, blooming is expected either to be impaired or to occur earlier.  
223 As a consequence of early blooming and warmer springs and summers, there will be an earlier  
224 occurrence of the ripening date (Figure 3d,g). In comparison with the reference period, the  
225 failures caused by not meeting the chilling requirement will cause numerous areas that are  
226 currently productive to become unsuitable. This is expected mainly in the Mediterranean  
227 regions and will be an important issue in the far future (see Figure 3e), especially for the  
228 RCP 8.5 scenario (see Figure S6e). In contrast, spring frost events and ripening failures will  
229 decrease, making continental areas in the northern part of the country more suitable for peach  
230 cultivation. Changes will be exacerbated in the far future of the RCP 8.5 scenario (Figure  
231 S6). In this far future scenario, there will be a paradoxical geographical divide, whereby the  
232 most suitable areas will be close to those that will not be able to host any cultivar because of  
233 the inability to bloom, while conditions would be optimal for fruit survival (*i.e.* no frost) and  
234 ripening.

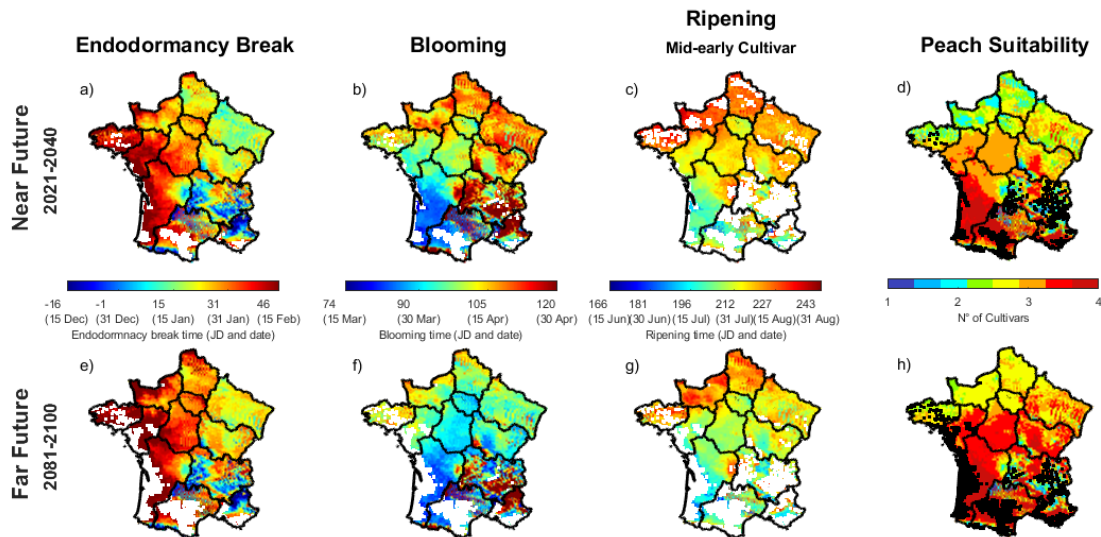

Figure 3: Peach phenological times and thermal niche for cultivation: scenarios forcing our model with RCP 4.5 in the French continental regions for the near (2021-2040, upper panels) and far (2081-2100, lower panels) future. (a,e) Endodormancy break, (b,f) blooming, (c,g) ripening of the mid-early cultivars dates, in Julian Days (JD) and calendar dates (within brackets), and (d,h) peach suitability. For each map cell ( $8 \times 8 \text{ km}^2$ ), the average value over the considered 20 years is reported. White map cells (a-c and e-g) represent those areas where the phenological event did not occur for at least two years. Likewise, black cells (d and h) represent those areas where no peach cultivar could be cultivated for at least two years (out of 20).

## 235 4 Discussion

### 236 4.1 Peach thermal niche in the reference period 1996-2015

237 Chill accumulation has historically not been considered as a limitation for peach cultivation in  
 238 the northern basin of the Mediterranean. This is consistent with our results indicating that  
 239 chilling requirement was systematically satisfied for the reference period 1996-2015 in the entire  
 240 French territory between mid-December and mid-February, with the milder regions satisfying  
 241 it later. On the other hand, frost damage and insufficient heat accumulation are known to be  
 242 primary limitations to the cultivation in Europe of peaches and other *Prunus* cultivars (e.g.  
 243 apricot and cherry, see Julian et al., 2007; Reig et al., 2013; Chmielewski et al., 2017; Vitasse and  
 244 Rebetez, 2018). For peaches, this was reflected in our study for those areas outside the current  
 245 French peach production regions, such as the north-western areas of Occitanie and the alpine  
 246 part of Auvergne Rhône-Alpes. Note that even if an area is suitable for the cultivation of very  
 247 few cultivars, generally such an area cannot be considered cost-effective for peach production  
 248 because the product would be available only for a limited time and late in the season (Layne

249 & Bassi, 2008). Our model identifies the locations of Occitanie, Auvergne-Rhône-Alpes (ARA)  
250 and Provence-Alpes-Côte d'Azur (PACA) as the most suitable area for peach cultivation in  
251 France. This outcome of our model is consistent with the fact that they currently provide more  
252 than 90% of the France's total peach production (Talpin, 1954; Ministère de l'Agriculture et  
253 de l'Alimentation, 2019).

## 254 **4.2 Peach thermal niche in the future**

255 Frost damage and heat accumulation constraints are predicted to wane in northern regions of  
256 continental France, namely in Pays de la Loire, Centre-Val de Loire and Bourgogne-France-  
257 Comté by the end of the 21<sup>st</sup> century, a result that is in line with projections of the northward  
258 expansion of other cultivars due to global warming (Chmielewski & Rötzer, 2001). If warmer  
259 winter temperatures determining earlier blooming are not followed by warmer spring temper-  
260 atures at blooming time, an higher risk of spring frost can occur (Liu et al., 2018; Vitasse &  
261 Rebetez, 2018). On the other hand, such risk can be neglected when also spring temperatures  
262 increase below the frosting threshold (Eccel et al., 2009; Chmielewski et al., 2017). Our re-  
263 sults suggest that, due to the specific interplay between peach phenology and French predicted  
264 climate change the second situation will likely occur in France.

265 According to our findings, the decline in winter chill will become the major limitation for  
266 peach cultivation. Blooming failure due to mild winters was first observed in northern Africa  
267 (Ghrab et al., 2014) and it is likely to become the norm in southern France by the end of the  
268 century. The limitation of the production area for peach appears to be even more severe using  
269 our model under the RCP 8.5 scenario (Figure S6), with a further shift of the suitable area  
270 towards the alpine and northern continental regions of the country. Our results are consistent  
271 with the growing concern regarding the impact of global warming on the endodormancy phe-  
272 nological phase. Several authors already provided evidence of abnormal patterns of bud break  
273 and fruit development in Europe (Legave et al., 1983; Erez & Couvillon, 1987; Viti et al., 2010)  
274 and relevant economic issues (Jackson & Hamer, 1980; Baldocchi & Wong, 2008; Luedeling  
275 et al., 2009; Ghrab et al., 2014).

276 Beyond shifting the geographies of the thermal niche of peaches, climate change is expected  
277 to alter peach phenology and physiology. We predict that blooming will occur between 5 and 20

278 days earlier than usual by the end of the century, depending on the area and the emission sce-  
279 nario. Earlier blooming has also been predicted by other authors for other species (Chmielewski  
280 et al., 2004; Dose & Menzel, 2004; Menzel et al., 2006; Estrella et al., 2007; Primack et al.,  
281 2009; Fujisawa & Kobayashi, 2010; Jochner et al., 2016; Parker & Abatzoglou, 2017). When  
282 dealing with commercial species, it is worth noting that faster fruit ripening due to increased  
283 temperatures affects fruit growth physiology (Lescourret & Genard, 2005). This might impair  
284 the quality, in terms of organoleptic properties, of the final product (Peiris et al., 1996).

285 Needless to say, all predicted changes in peach phenology and thermal niche depend on  
286 methodological choices regarding both the climate change scenarios and the phenological mod-  
287 els. Reliable models to estimate blooming dates are still lacking due to the complex interplay  
288 of the processes governing endo- and eco-dormancy breaks (Bartolini et al., 2018) and dis-  
289 crepancies between different models are unfortunately still the norm rather than the exception  
290 (Chmielewski et al., 2012; Andreini et al., 2014). The main challenge is to achieve a better  
291 understanding of the chill accumulation and endodormancy break processes (Luedeling, 2012).  
292 New empirical data that provide measures of endodormancy break dates, such as those studied  
293 by Chuine et al. (2016), are to our view urgently needed so as to conceive, calibrate and vali-  
294 date models aimed at testing further hypotheses. In our model we assumed that plant water  
295 needs would be met through irrigation. However, climate changes are expected to increase the  
296 frequency of both drought and heavy precipitation events (IPCC, 2013), factors that surely  
297 will impact water availability for agriculture (Elliott et al., 2014). Moreover, shifts in the plant  
298 phenological dates and geographical range may result in another possible mismatch with pol-  
299 linator phenology (Scaven & Rafferty, 2013) and photoperiod (Hänninen & Tanino, 2011; Way  
300 & Montgomery, 2015). This latter will not change as the climate warms, yet the potential  
301 break of the synchrony in the plant-climate integrated system remains highly probable. Like-  
302 wise, plants may be exposed to new parasites and consequent diseases (Chakraborty & Newton,  
303 2011). Only when a transdisciplinary and broader approach will provide further evidence, the  
304 inclusion of these processes, and possibly others, in our framework will be possible.

### 305 4.3 Adapting to climate change

306 Despite the uncertainty which is inherent in any projection, there is no doubt that climate  
307 changes will affect peach phenology and the geographical range of the thermal niche. Our study  
308 corroborate the intuition that current suitable areas can turn into unsuitable and viceversa.  
309 This will occur to the extent that adaptation strategies will be required. As insufficient winter  
310 chill will be the major issue, some research breeding studies have been started to search for  
311 cultivars with low or no chilling requirements. Such cultivars are already being utilized in  
312 tropical and subtropical climates (Layne & Bassi, 2008). However, chill requirements evolved  
313 to protect plants from frost damages and “artificially” lowering them might increase the impacts  
314 of frost damages. Some chemicals have been shown to be effective in forcing flowering and bud  
315 burst in dormant plants (Erez et al., 2008; Ashebir et al., 2010). However, they are effective only  
316 under given environmental conditions (Campoy et al., 2011) and they make use of phytotoxic  
317 compounds (Luedeling, 2012). It has also been shown that winter agronomic practices (like  
318 sprinkling water over shoots) can reduce the buds temperature by evaporative cooling (Erez,  
319 1995).

320 An alternative adaptation strategy could consist in moving the peach production into new  
321 suitable areas. This strategy has three obvious drawbacks: *i*) the costs of crop translocation is  
322 substantial, *ii*) additional costs can be incurred in transporting fruit to centralized processing  
323 and distribution facilities (Parker & Abatzoglou, 2017), and *iii*) the sociological implications of  
324 the growers’ behavior should be considered as they will ultimately govern the reality of peach  
325 cultivation in new regions.

## 326 5 Conclusions

327 Our study provides a model to produce data-informed maps that quantitatively allow the anal-  
328 ysis of the geographical limitations and challenges that the peach industry may face under  
329 climate change in France. Here, we used the best currently available information about phe-  
330 nology of fruit trees. We developed a novel phenological model that is not site specific, thus it  
331 can be applied to other systems where climate change scenarios are available. It is clear that  
332 global warming will impact the economic viability of peach production and models can support



333 actions to be taken now to adapt to change.

## 334 Acknowledgments

335 This work has been partly carried out as part of the INRA Metaprogramme ACCAF (project  
336 429 CLIF). We thank Agroclim unit (INRAE) for providing data from the different weather sta-  
337 tions via their web service Climatik, and the TEMPO French Network (<https://tempo.pheno.fr/>)  
338 for providing the access to different phenological data resources in their portal. This work has  
339 been carried out as part of the ECOVERGER project. This action is led by the Ministry for  
340 Agriculture and Food and the Ministry for an Ecological and Solidary Transition, with the  
341 financial support of the French Biodiversity Agency on “Resistance and Pesticides” research  
342 call, with the fees for diffuse pollution coming from the Ecophyto plan.

## 343 References

- 344 Ahmadi, H., & Baaghdeh, M. (2018). Impacts of climate change on apple tree cultivation areas in  
345 Iran. *Climatic Change*, 153. <https://doi.org/10.1007/s10584-018-2316-x>
- 346 Allen, M., Dejong, T., & Prusinkiewicz, P. (2006). L-peach, an l-systems based model for simulating  
347 the architecture and carbon partitioning of growing fruit trees. *Acta Horticulturae*, 71–76.  
348 <https://doi.org/10.17660/ActaHortic.2006.707.8>
- 349 Andreini, L., de Cortázar-Atauri, I. G., Chuine, I., Viti, R., Bartolini, S., Ruiz, D., Campoy, J. A.,  
350 Legave, J. M., Audergon, J.-M., & Bertuzzi, P. (2014). Understanding dormancy release in  
351 apricot flower buds (*Prunus armeniaca L.*) using several process-based phenological models.  
352 *Agricultural and forest meteorology*, 184, 210–219. [https://doi.org/10.1016/j.agrformet.2013.](https://doi.org/10.1016/j.agrformet.2013.10.005)  
353 10.005
- 354 Ashebir, D., Deckers, T., Nyssen, J., Bihon, W., Tsegay, A., Tekie, H., Poesen, J., Haile, M., Won-  
355 dumagegneheu, F., Raes, D., et al. (2010). Growing apple (*Malus domestica*) under tropical  
356 mountain climate conditions in northern Ethiopia. *Experimental Agriculture*, 46, 53–65. <https://doi.org/10.1017/S0014479709990470>
- 358 Baldocchi, D., & Wong, S. (2008). Accumulated winter chill is decreasing in the fruit growing regions  
359 of California. *Climatic Change*, 87, S153–S166. <https://doi.org/10.1007/s10584-007-9367-8>

- 360 Bartolini, S., Massai, R., Iacona, C., Guerriero, R., & Viti, R. (2018). Forty-year investigations on  
361 apricot blooming: Evidences of climate change effects. *Scientia Horticulturae*, *244* (2019), 399–  
362 405. <https://doi.org/10.1016/j.scienta.2018.09.070>
- 363 Battey, N. (2000). Aspects of seasonality. *Journal of experimental botany*, *51*, 1769–80. <https://doi.org/10.1093/jexbot/51.352.1769>
- 364
- 365 Burnham, D. R., & Anderson, K. P. (2002). Model selection and multimodel inference: A practical  
366 information-theoretic approach. New York, NY: Springer.
- 367 Campoy, J., Ruiz, D., & Egea, J. (2011). Dormancy in temperate fruit trees in a global warming  
368 context: A review. *Scientia Horticulturae*, *130*, 357–372. <https://doi.org/10.1016/j.scienta.2011.07.011>
- 369
- 370 Chakraborty, D. S., & Newton, A. (2011). Climate change, plant diseases and food security: An  
371 overview. plant pathol spec issue: Clim chang plant dis 1:2-14. *Plant Pathology*, *60*, 2–14.  
372 <https://doi.org/10.1111/j.1365-3059.2010.02411.x>
- 373 Chmielewski, F.-M., Blümel, K., & Pálesová, I. (2012). Climate change and shifts in dormancy release  
374 for deciduous fruit crops in Germany. *Climate Research*, *54*, 209–219. <https://doi.org/10.3354/cr01115>
- 375
- 376 Chmielewski, F.-M., Götz, K.-P., Weber, K., & Moryson, S. (2017). Climate change and spring frost  
377 damages for sweet cherries in Germany. *International Journal of Biometeorology*, *62*. <https://doi.org/10.1007/s00484-017-1443-9>
- 378
- 379 Chmielewski, F.-M., & Götz, K.-P. (2016). Performance of models for the beginning of sweet cherry  
380 blossom under current and changed climate conditions. *Agricultural and Forest Meteorology*,  
381 *218-219*, 85–91. <https://doi.org/10.1016/j.agrformet.2015.11.022>
- 382 Chmielewski, F.-M., Müller, A., & Bruns, E. (2004). Climate changes and trends in phenology of  
383 fruit trees and field crops in Germany, 1961-2000. *Agricultural and Forest Meteorology*, 69–78.  
384 [https://doi.org/10.1016/S0168-1923\(03\)00161-8](https://doi.org/10.1016/S0168-1923(03)00161-8)
- 385 Chmielewski, F.-M., & Rötzer, T. (2001). Response of tree phenology to climate change across Europe.  
386 *Agricultural and Forest Meteorology*, 101–112. [https://doi.org/10.1016/S0168-1923\(01\)00233-7](https://doi.org/10.1016/S0168-1923(01)00233-7)
- 387 Chuine, I. (2010). Why does phenology drive species distribution? *Philosophical Transactions of the*  
388 *Royal Society B: Biological Sciences*, *365*(1555), 3149–3160. <https://doi.org/10.1098/rstb.2010.0142>
- 389

- 390 Chuine, I. (2001). A unified model for budburst of trees. *Journal of theoretical biology*, *207*, 337–47.  
391 <https://doi.org/10.1006/jtbi.2000.2178>
- 392 Chuine, I., Bonhomme, M., Legave, J.-M., Garcia de Cortazar-Atauri, I., Charrier, G., Lacoïnte, A., &  
393 Améglio, T. (2016). Can phenological models predict tree phenology accurately in the future?  
394 the unrevealed hurdle of endodormancy break. *Global Change Biology*, *22*. <https://doi.org/10.1111/gcb.13383>
- 396 Dose, V., & Menzel, A. (2004). Bayesian analysis of climate change impacts in phenology. *Global*  
397 *Change Biology*, *10*, 259–272. <https://doi.org/10.1111/j.1529-8817.2003.00731.x>
- 398 Drias. (2013). Données Météo-France, CERFACS, IPSL.
- 399 Duchêne, E., Huard, F., Dumas, V., Schneider, C., & Merdinoglu, D. (2010). The challenge of adapting  
400 grapevine varieties to climate change. *Climate Research - CLIMATE RES*, *41*, 193–204. <https://doi.org/10.3354/cr00850>  
401 [//doi.org/10.3354/cr00850](https://doi.org/10.3354/cr00850)
- 402 Eccel, E., Rea, R., Caffarra, A., & Crisci, A. (2009). Risk of spring frost to apple production un-  
403 der future climate scenarios: The role of phenological acclimation. *International journal of*  
404 *biometeorology*, *53*(3), 273–286.
- 405 Elliott, J., Deryng, D., Müller, C., Frieler, K., Konzmann, M., Gerten, D., Glotter, M., Flörke, M.,  
406 Wada, Y., Best, N., et al. (2014). Constraints and potentials of future irrigation water avail-  
407 ability on agricultural production under climate change. *Proceedings of the National Academy*  
408 *of Sciences*, *111*(9), 3239–3244.
- 409 Erez, A. (1995). Means to compensate for insufficient chilling to improve bloom and leafing. *Acta*  
410 *Horticulturae*, *395*, 81–96. <https://doi.org/10.17660/ActaHortic.1995.395.7>
- 411 Erez, A., & Couvillon, G. (1987). Characterization of the influence of moderate temperatures on rest  
412 completion in peach. *J. Amer. Soc. Hort. Sci.*, *112*, 677–680.
- 413 Erez, A., Yablowitz, Z., Aronovitz, A., & Hadar, A. (2008). Dormancy breaking chemicals; efficiency  
414 with reduced phytotoxicity. *Acta Horticulturae*, *772*, 105–112. <https://doi.org/10.17660/ActaHortic.2008.772.12>  
415 [ActaHortic.2008.772.12](https://doi.org/10.17660/ActaHortic.2008.772.12)
- 416 Estrella, N., Sparks, T., & Menzel, A. (2007). Trends and temperature response in the phenology of  
417 crops in Germany. *Global Change Biology*, *13*, 1737–1747. <https://doi.org/10.1111/j.1365-2486.2007.01374.x>  
418 [2486.2007.01374.x](https://doi.org/10.1111/j.1365-2486.2007.01374.x)

- 419 Fujisawa, M., & Kobayashi, K. (2010). Apple (*Malus pumila* var. domestica) phenology is advancing  
420 due to rising air temperature in northern Japan. *Global Change Biology*, *16*, 2651–2660. <https://doi.org/10.1111/j.1365-2486.2009.02126.x>  
421
- 422 Gauzere, J., Delzon, S., Davi, H., Bonhomme, M., Garcia de Cortazar-Atauri, I., & Chuine, I. (2017).  
423 Integrating interactive effects of chilling and photoperiod in phenological process-based models.  
424 a case study with two European tree species: *Fagus sylvatica* and *Quercus petraea*. *Agricultural  
425 and Forest Meteorology*, *244-245*, 9–20. <https://doi.org/10.1016/j.agrformet.2017.05.011>
- 426 Génard, M., & Huguet, J. G. (1996). Modeling the response of peach fruit to water stress. *Tree  
427 physiology*, *16*, 407–15. <https://doi.org/10.1093/treephys/16.4.407>
- 428 Ghrab, M., Ben Mimoun, M., Masmoudi, M., & Ben Mechlia, N. (2014). Chilling trends in a warm pro-  
429 duction area and their impact on flowering and fruiting of peach trees. *Scientia Horticulturae*,  
430 *178*, 87–94. <https://doi.org/10.1016/j.scienta.2014.08.008>
- 431 Gritti, E., Gaucherel, C., Crespo-Pérez, V., & Chuine, I. (2013). How can model comparison help  
432 improving species distribution models? *PloS one*, *8*, e68823. <https://doi.org/10.1371/journal.pone.0068823>  
433
- 434 Hänninen, H., & Tanino, K. (2011). Tree seasonality in a warming climate. *Trends in plant science*,  
435 *16*(8), 412–416.
- 436 IPCC. (2013). *Climate change 2013: The physical science basis. contribution of working group i to the  
437 fifth assessment report of the intergovernmental panel on climate change* (U. K. Cambridge  
438 University Press Cambridge & N. Y. (USA), Eds.; tech. rep.).
- 439 Jackson, J., & Hamer, P. (1980). The causes of year-to-year variation in the average yield of cox's  
440 orange pippin apple in England. *J. Hort. Sci.*, *55*, 149–156. <https://doi.org/10.1080/00221589.1980.11514917>  
441
- 442 Jochner, S., Sparks, T., Laube, J., & Menzel, A. (2016). Can we detect a nonlinear response to  
443 temperature in european plant phenology? *International journal of biometeorology*, *60*. <https://doi.org/10.1007/s00484-016-1146-7>  
444
- 445 Julian, C., Herrero, M., & Rodrigo, J. (2007). Flower bud drop and pre-blossom frost damage in  
446 apricot (*Prunus armeniaca* L.) *Journal of Applied Botany and Food Quality*, *81*, 21–25.
- 447 Keenan, T., SERRA, J., LLORET, F., Ninyerola, M., & Sabaté, S. (2011). Predicting the future of  
448 forests in the mediterranean under climate change, with niche- and process-based models: Co2

- 449 matters! *Global Change Biology*, *17*, 565–579. [https://doi.org/10.1111/j.1365-2486.2010.](https://doi.org/10.1111/j.1365-2486.2010.02254.x)  
450 02254.x
- 451 Kenealy, L., Reighard, G., Rauh, B., & Jr, W. (2015). Predicting peach maturity dates in South  
452 Carolina with a growing degree day model. *Acta Horticulturae*, *1084*, 479–752. [https://doi.](https://doi.org/10.17660/ActaHortic.2015.1084.100)  
453 [org/10.17660/ActaHortic.2015.1084.100](https://doi.org/10.17660/ActaHortic.2015.1084.100)
- 454 Körner, C., & Basler, D. (2010). Phenology under global warming. *Science*, *327*, 1461–1462. <https://doi.org/10.1126/science.1186473>  
455 <https://doi.org/10.1126/science.1186473>
- 456 Lagarias, J. C., Reeds, J. A., Wright, M. H., & Wright, P. E. (1998). Convergence properties of the  
457 nelder–mead simplex method in low dimensions. *SIAM Journal on optimization*, *9*(1), 112–  
458 147.
- 459 Laube, J., Sparks, T., Estrella, N., Höfler, J., Ankerst, D., & Menzel, A. (2014). Chilling outweighs  
460 photoperiod in preventing precocious spring development. *Global Change Biology*, *20*, 170–82.  
461 <https://doi.org/10.1111/gcb.12360>
- 462 Layne, D., & Bassi, D. (2008). *The peach: Botany, production and uses*.
- 463 Lee, J. H., Ryu, H.-S., Chung, K. S., Posé, D., Kim, S., Schmid, M., & Ahn, J. H. (2013). Regulation  
464 of temperature-responsive flowering by mads-box transcription factor repressors. *Science (New*  
465 *York, N. Y.)* <https://doi.org/10.1126/science.1241097>
- 466 Legave, J.-M., Garcia, M., & Marco, F. (1983). Some descriptive aspects of drops process of flower  
467 buds, or young flowers observed on apricot tree in south of France. [https://doi.org/10.17660/](https://doi.org/10.17660/ActaHortic.1983.121.6)  
468 [ActaHortic.1983.121.6](https://doi.org/10.17660/ActaHortic.1983.121.6)
- 469 Lenoir, J., Gégout, J.-C., Marquet, P., Ruffray, P., & Brisse, H. (2008). A significant upward shift  
470 in plant species optimum elevation during the 20th century. *Science (New York, N. Y.)*, *320*,  
471 1768–71. <https://doi.org/10.1126/science.1156831>
- 472 Lescourret, F., & Genard, M. (2005). A virtual peach fruit model simulating changes in fruit quality  
473 during the final stage of fruit growth. *Tree physiology*, *25*, 1303–15. [https://doi.org/10.1093/](https://doi.org/10.1093/treephys/25.10.1303)  
474 [treephys/25.10.1303](https://doi.org/10.1093/treephys/25.10.1303)
- 475 Litschmann, T., Oukropec, I., & Křížan, B. (2008). Predicting individual phenological phases in  
476 peaches using meteorological data. *Horticultural Science*, *35*, 65–71. [https://doi.org/10.](https://doi.org/10.17221/640-HORTSCI)  
477 [17221/640-HORTSCI](https://doi.org/10.17221/640-HORTSCI)

- 478 Liu, Q., Piao, S., Janssens, I. A., Fu, Y., Peng, S., Lian, X., Ciais, P., Myneni, R. B., Peñuelas, J.,  
479 & Wang, T. (2018). Extension of the growing season increases vegetation exposure to frost.  
480 *Nature Communications*, *9*(1), 1–8.
- 481 Lobell, D., & Field, C. (2012). California perennial crops in a changing climate. *Climatic Change*, *109*,  
482 DOI: 10.1007/s10584-011. <https://doi.org/10.1007/s10584-011-0303-6>
- 483 Luedeling, E. (2012). Climate change impacts on winter chill for temperate fruit and nut production:  
484 A review. *Scientia Horticulturae*, *144*, 218–229. <https://doi.org/10.1016/j.scienta.2012.07.011>
- 485 Luedeling, E., Zhang, M., & Girvetz, E. (2009). Climatic changes lead to declining winter chill for  
486 fruit and nut trees in California during 1950–2099. *PloS one*, *4*, e6166. <https://doi.org/10.1371/journal.pone.0006166>
- 488 Machovina, B., & Feeley, K. (2013). Climate change driven shifts in the extent and location of areas  
489 suitable for export banana production. *Ecological Economics*, *95*, 83–95. <https://doi.org/10.1016/j.ecolecon.2013.08.004>
- 491 Menzel, A., & Fabian, P. (1999). Growing season extend in Europe. *Nature*, *397*. <https://doi.org/10.1038/17709>
- 493 Menzel, A., Sparks, T., Estrella, N., Koch, E., Aasa, A., Ahas, R., Alm-Kübler, K., Bissolli, P.,  
494 Braslavská, O., Briede, A., Chmielewski, F., Črepinšek, Z., Curnel, Y., Defila, C., Donnelly,  
495 A., Filella, I., Jatzcak, K., Mâge, F., & Züst, A. (2006). European phenological response to  
496 climate change matches the warming pattern. *Global Change Biology*, *12*, 1969–1976. <https://doi.org/10.1111/j.1365-2486.2006.01193.x>
- 498 Miller, P., Lanier, W., & Brandt, S. (2001). Using growing degree days to predict plant stages. *Montana*  
499 *State University Extension Service*, *9*, 1–8.
- 500 Ministère de l’Agriculture et de l’Alimentation, A. (2019). *Au 1er septembre 2019, production de pêches*  
501 *en-dessous de la moyenne et chiffre d’affaires national en hausse sur un an* (tech. rep.).
- 502 Miras-Avalos, J., Egea, G., Nicolás, E., Genard, M., Vercambre, G., Moitrier, N., Valsesia, P., González-  
503 Real, M., Bussi, C., & Lescourret, F. (2011). Qualitree, a virtual fruit tree to study the man-  
504 agement of fruit quality. II. parameterisation for peach, analysis of growth-related processes  
505 and agronomic scenarios. *Trees*, *25*, 785–799. <https://doi.org/10.1007/s00468-011-0555-9>
- 506 Morin, X., Viner, D., & Chuine, I. (2008). Tree species range shifts at a continental scale: New  
507 predictive insights from a process-based model. *Journal of Ecology*, *96*, 784–794. <https://doi.org/10.1111/j.1365-2745.2008.01369.x>
- 508

- 509 Obi, V., Barriuso, J., & Gogorcena, Y. (2018). Peach brown rot: Still in search of an ideal management  
510 option. *Agriculture*, 8, 125. <https://doi.org/10.3390/agriculture8080125>
- 511 Parker, L., & Abatzoglou, J. (2017). Shifts in the thermal niche of almond under climate change.  
512 *Climatic Change*, 1–14. <https://doi.org/10.1007/s10584-017-2118-6>
- 513 Peiris, D., Crawford, J., Grashoff, C., Jefferies, R., Porter, J., & Marshall, B. (1996). A simulation study  
514 of crop growth and development under climate change. *Agriculture and Forest Meteorology* 79:  
515 271–287, 79. [https://doi.org/10.1016/0168-1923\(95\)02286-4](https://doi.org/10.1016/0168-1923(95)02286-4)
- 516 Primack, R., Ibáñez, I., Higuchi, H., Lee, S.-D., Miller-Rushing, A., Wilson, A., & Silander, J. (2009).  
517 Spatial and interspecific variability in phenological responses to warming temperatures. *Bio-*  
518 *logical Conservation*, 142, 2569–2577. <https://doi.org/10.1016/j.biocon.2009.06.003>
- 519 Reig, G., Iglesias, I., Miranda, C., Gatiús, F., & Alegre, S. (2013). How does simulated frost treatment  
520 affect peach [*Prunus persica* (L.)] flowers of different cultivars from worldwide breeding pro-  
521 grammes? *Scientia Horticulturae*, 160, 70–77. <https://doi.org/10.1016/j.scienta.2013.05.021>
- 522 Rodrigo, J. (2000). Spring frosts in deciduous fruit trees. morphological damage and flower hardiness.  
523 *Scientia Horticulturae*, 92, 155–173. [https://doi.org/10.1016/S0304-4238\(99\)00150-8](https://doi.org/10.1016/S0304-4238(99)00150-8)
- 524 Santos, J., Costa, R., & Fraga, H. (2016). Climate change impacts on thermal growing conditions of  
525 main fruit species in Portugal. *Climatic Change*. <https://doi.org/10.1007/s10584-016-1835-6>
- 526 Savin, N. (1980). The bonferroni and scheffe multiple comparison procedures. *Review of Economic*  
527 *Studies*, 47, 255–73. <https://doi.org/10.2307/2297112>
- 528 Scaven, T., & Rafferty, N. (2013). Physiological effects of climate warming on flowering plants and  
529 insect pollinators and potential consequences for their interactions. *Current zoology*, 59, 418–  
530 426. <https://doi.org/10.1093/czoolo/59.3.418>
- 531 Seguin, B. (2004). The phenoclim database for fruit trees and vine in france. *Challenging Times*, 75.
- 532 Snyder, R., & Melo-Abreu, J. (2005). *Frost protection: Fundamentals, practice and economics, vol. i.*
- 533 Talpin, J. (1954). *Economies d'énergie sur l'exploitation agricole.*
- 534 Tao, F., Yokozawa, M., Xu, Y., Hayashi, Y., & Zhang, Z. (2006). Climate changes and trends in  
535 phenology and yields of field crops in China, 1981-2000. *Agricultural and Forest Meteorology*,  
536 138, 82–92. <https://doi.org/10.1016/j.agrformet.2006.03.014>
- 537 Teixeira, E., Fischer, G., Velthuizen, H., Walter, C., & Ewert, F. (2011). Global hot-spots of heat  
538 stress on agricultural crops due to climate change. *Agricultural and Forest Meteorology*, 170,  
539 206–215. <https://doi.org/10.1016/j.agrformet.2011.09.002>

- 540 Vitasse, Y., & Rebetez, M. (2018). Unprecedented risk of spring frost damage in Switzerland and  
541 Germany in 2017. *Climatic Change*, *149*. <https://doi.org/10.1007/s10584-018-2234-y>
- 542 Viti, R., Andreini, L., Ruiz, D., Egea, J., Bartolini, S., Iacona, C., & Campoy, J. (2010). Effect of  
543 climatic conditions on the overcoming of dormancy in apricot flower buds in two mediterranean  
544 areas: Murcia (Spain) and Tuscany (Italy). *Scientia Horticulturae*, *124*, 217–224. <https://doi.org/10.1016/j.scienta.2010.01.001>
- 545
- 546 Way, D. A., & Montgomery, R. A. (2015). Photoperiod constraints on tree phenology, performance  
547 and migration in a warming world. *Plant, Cell & Environment*, *38*(9), 1725–1736.
- 548 White, M., Diffenbaugh, N., Jones, G., Pal, J., & Giorgi, F. (2006). Extreme heat reduces and shifts  
549 United States premium wine production in the 21st century. *Proceedings of the National  
550 Academy of Sciences of the United States of America*, *103*, 11217–22. [https://doi.org/10.  
551 1073/pnas.0603230103](https://doi.org/10.1073/pnas.0603230103)
- 552 Whittaker, R. (1975). Communities and ecosystems. *Macmillan Publishing Co. Inc., New York, New  
553 York*.
- 554 Wolkovich, E., Burge, D., Walker, M., & Nicholas, K. (2017). Phenological diversity provides op-  
555 portunities for climate change adaptation in winegrapes. *Journal of Ecology*, *105*, 905–912.  
556 <https://doi.org/10.1111/1365-2745.12786>
- 557 Yu, H., Luedeling, E., & Xu, J. (2010). Winter and spring warming result in delayed spring phenology  
558 on the Tibetan Plateau. *Proceedings of the National Academy of Sciences of the United States  
559 of America*, *107*, 22151–6. <https://doi.org/10.1073/pnas.1012490107>
- 560 Zhao, Y., Cao, H., Xu, W., Chen, G., Lian, J., Du, Y., & Ma, K. (2018). Contributions of precipita-  
561 tion and temperature to the large scale geographic distribution of fleshy-fruited plant species:  
562 Growth form matters. *Scientific reports*, *8*(1), 1–9.
- 563 Ziosi, V., Scaramagli, S., Bregoli, A., Biondi, S., & Torrigiani, P. (2003). Peach (*Prunus persica L.*) fruit  
564 growth and ripening: Transcript levels and activity of polyamine biosynthetic enzymes in the  
565 mesocarp. *Journal of plant physiology*, *160*, 1109–15. <https://doi.org/10.1078/0176-1617-00924>



566 **Supporting Information**

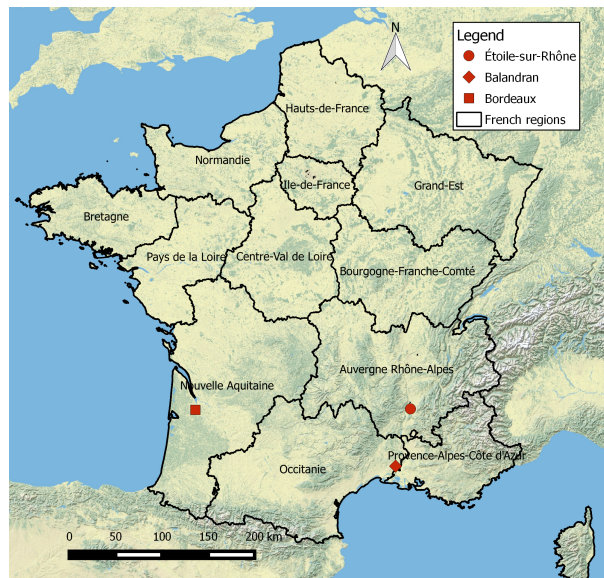

Figure S1: French continental regions and sampling sites of blooming and ripening dates.

Table S1: Meteorological stations. Meteorological station coordinates used for the period of interest in Balandran, Bordeaux and Étoile-sur-Rhône sites

| Phenological data site | Years of interest | Longitude | Latitude  |
|------------------------|-------------------|-----------|-----------|
| Balandran              | 1986-2004         | 4° 26' E  | 43° 47' N |
|                        | 2005-2008         | 4° 28' E  | 43° 45' N |
| Bordeaux               | 1986-1999         | 0° 35' W  | 44° 47' N |
| Étoile-sur-Rhône       | 1996-2005         | 4° 44' E  | 44° 35' N |

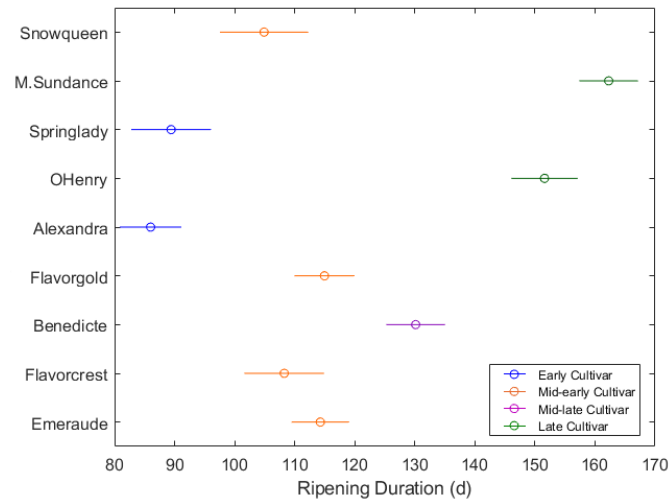

Figure S2: Peach cultivar and ripening duration. Cultivar clustering of the ripening duration period (multiple t-test, Scheffé's procedure). In blue, orange, purple and green are represented early, mid-early, mid-late and late cultivars, respectively.

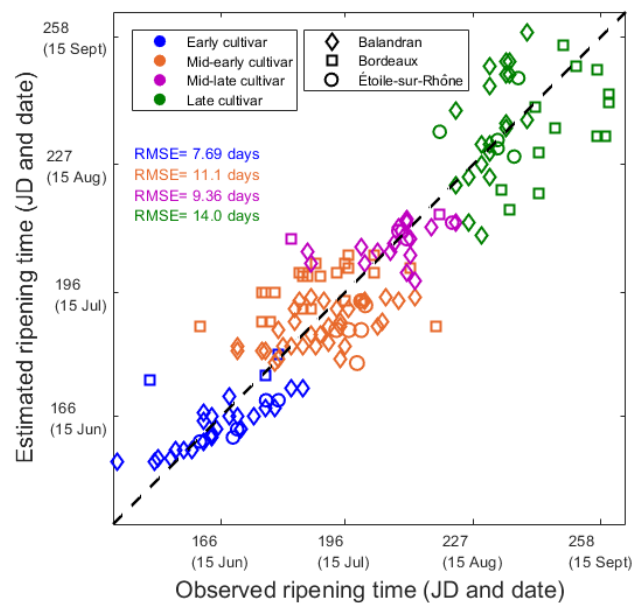

Figure S3: Observed and predicted dates of ripening. The ripening date has been predicted by summing the predicted ripening duration to the predicted (not observed as in fig. 1) date of blooming. Diamonds, squares and circles refer to the sites of Balandran, Bordeaux and Étoile-sur-Rhône, respectively. Ripening date is represented in blue for early, in orange for mid-early, in purple for mid-late and in green for late cultivars.

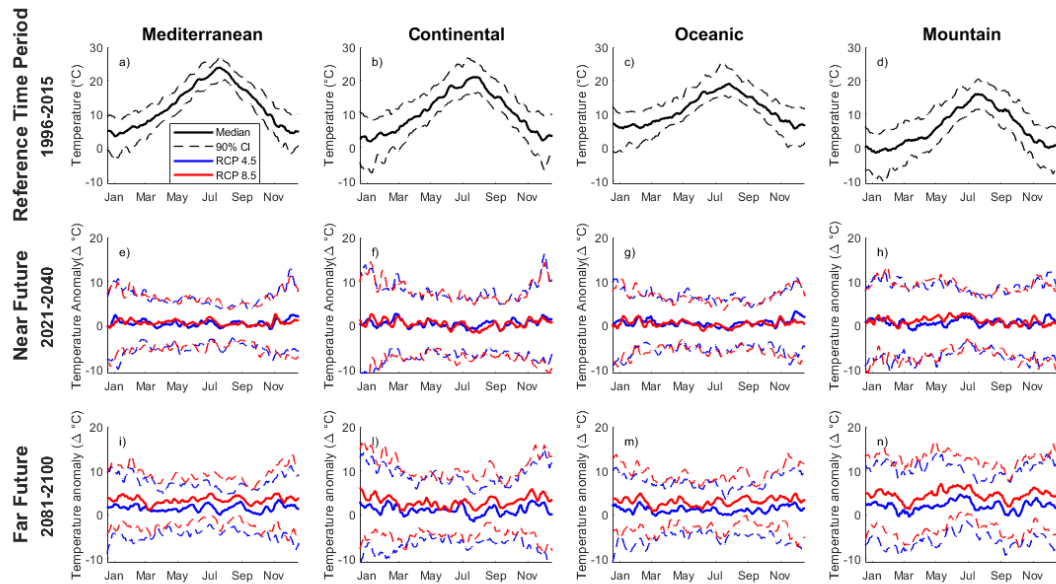

Figure S4: Temperatures in Mediterrean, continental, oceanic and mountain areas of the French territory: hindcast and forecast. Mean daily temperature, averaged with a moving window of 10 days, in the reference period (1996-2015) in black (a, b, c, d) and relevant anomalies in the near (2021-2040) and far (2081-2100) future in four areas of  $24 \times 24 \text{ km}^2$  representative of different climatic zones: Mediterrean ( $43^\circ 53' \text{ N } 5^\circ 4' \text{ E}$ ), continental ( $48^\circ 48' \text{ N } 4^\circ 14' \text{ E}$ ), oceanic ( $48^\circ 11' \text{ N } 2^\circ 59' \text{ W}$ ) and mountain ( $42^\circ 53' \text{ N } 0^\circ 2' \text{ E}$ ). In black the temperatures in the reference period, in red and blue the temperature anomalies, compared to the reference period, in RCP 4.5 and in RCP 8.5, respectively. Solid lines represent the median daily temperatures, while dashed ones the 5% and 95% percentile.

Table S2: Seasonal temperature anomaly in Mediterranean, continental, oceanic and mountain areas of the French territory: forecast. Average seasonal temperature ( $^{\circ}\text{C}$ ) in the reference period (1996-2015) and temperature anomaly ( $\Delta^{\circ}\text{C}$ ) in the near (2021-2040) and far (2081-2100) future, in four different French climatic zones (Mediterranean, continental, oceanic and mountain). Relative 90% confidence interval are reported in square brackets. See Figure S4 for details about the climatic areas.

|             |        | Average Temperature ( $^{\circ}\text{C}$ )               |                   |                  |                  |
|-------------|--------|----------------------------------------------------------|-------------------|------------------|------------------|
| Time period | Season | Mediterranean                                            | Continental       | Oceanic          | Mountain         |
| Reference   | Spring | 11.2 [12.3;14.7]                                         | 11.6 [10.2;12.3]  | 11.3 [9.9;12.0]  | 5.4 [3.5;5.1]    |
|             | Summer | 21.1 [19.6;22.2]                                         | 18.6 [17.1;21.0]  | 17.4 [16.0;19.2] | 13.5 [11.7;15.8] |
|             | Autumn | 10.0 [8.7;11.3]                                          | 8.1 [6.3;9.7]     | 9.8 [8.3;11.5]   | 4.8 [2.7;6.2]    |
|             | Winter | 5.2 [3.3;6.8]                                            | 3.8 [0.83;5.35]   | 6.5 [4.3;7.3]    | -0.24 [-2.4;1.2] |
|             |        | RCP 4.5-Temperature Anomaly ( $\Delta^{\circ}\text{C}$ ) |                   |                  |                  |
| Time period | Season | Mediterranean                                            | Continental       | Oceanic          | Mountain         |
| Near future | Spring | -0.071 [-2.3;2.7]                                        | 0.22 [-2.4;2.2]   | 0.23 [-2.0;2.2]  | 0.044 [-3.0;5.2] |
|             | Summer | 0.44 [-1.5;2.2]                                          | 0.39 [-2.3;2.2]   | 0.052 [-1.4;2.4] | 1.2 [-1.6;3.5]   |
|             | Autumn | 0.39 [-2.0;3.2]                                          | -0.045 [-1.2;3.8] | 0.52 [-0.93;3.5] | 0.015 [-2.4;5.0] |
|             | Winter | 1.3 [-2.2;3.1]                                           | 1.2 [-3.0;4.3]    | 0.93 [-1.3;3.2]  | 1.5 [-1.6;3.4]   |
| Far future  | Spring | 1.2 [-0.78;0.87]                                         | 0.70 [-1.6;3.7]   | 0.92 [-1.3;3.6]  | 2.0 [-1.5;6.5]   |
|             | Summer | 1.4 [0.36;3.1]                                           | 0.51 [-2.24;3.1]  | 0.75 [-0.70;2.4] | 2.5 [0.47;4.3]   |
|             | Autumn | 1.4 [-1.1;3.2]                                           | 1.6 [-1.3;4.0]    | 1.6 [0.94;4.0]   | 1.7 [-1.3;5.1]   |
|             | Winter | 2.1 [-1.0;4.6]                                           | 1.3 [-2.6;5.1]    | 1.1 [-2.0;4.2]   | 2.2 [-1.0;5.1]   |
|             |        | RCP 8.5-Temperature Anomaly ( $\Delta^{\circ}\text{C}$ ) |                   |                  |                  |
| Time period | Season | Mediterranean                                            | Continental       | Oceanic          | Mountain         |
| Near future | Spring | 0.39 [-2.3;2.2]                                          | 0.35 [-1.8;3.1]   | 0.18 [-1.5;2.2]  | 1.4 [-1.9;4.9]   |
|             | Summer | 0.21 [-1.9;2.5]                                          | -0.28 [-4.4;3.0]  | -0.51 [-2.6;2.2] | 1.4 [-1.2;3.6]   |
|             | Autumn | 0.22 [-0.99;2.3]                                         | 0.42 [-4.4;2.6]   | 0.33 [-1.6;2.7]  | 0.30 [-2.4;3.8]  |
|             | Winter | 1.0 [-2.1;3.1]                                           | 0.71 [-2.9;4.2]   | 0.78 [-2.0;2.4]  | 0.83 [-1.6;2.9]  |
| Far future  | Spring | 2.63 [1.2;5.6]                                           | 1.7 [0.41;5.3]    | 1.8 [0.94;4.7]   | 4.6 [0.84;9.1]   |
|             | Summer | 3.6 [2.0;5.9]                                            | 2.9 [-0.41;5.3]   | 3.0 [0.47;5.6]   | 5.1 [3.1;7.5]    |
|             | Autumn | 3.3 [1.4;5.4]                                            | 3.50 [0.66;6.0]   | 3.4 [1.2;5.9]    | 4.2 [1.7;6.6]    |
|             | Winter | 3.2 [1.2;6.1]                                            | 3.04 [1.3;8.3]    | 2.8 [2.0;7.1]    | 4.1 [1.6;7.6]    |

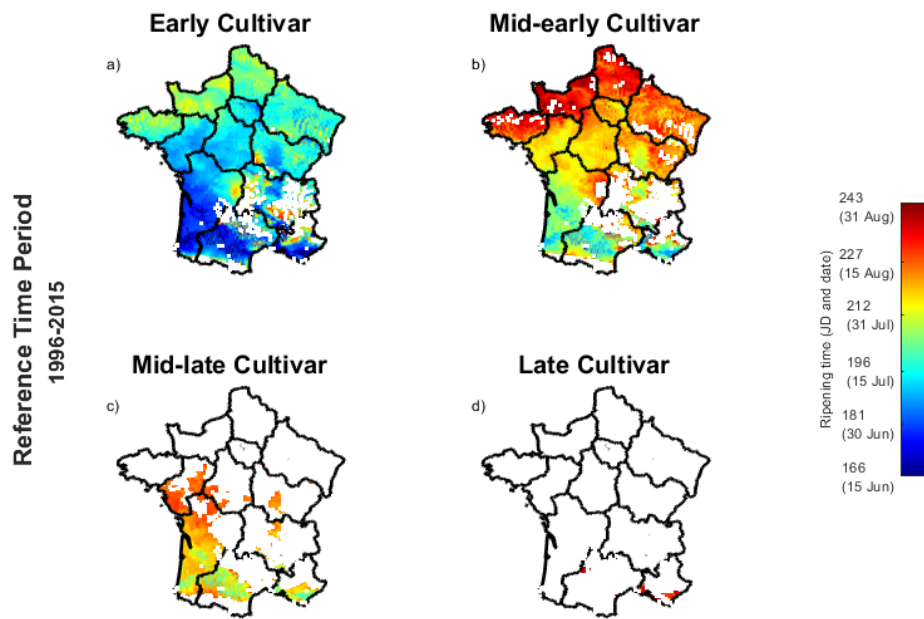

Figure S5: Peach cultivar ripening time in the French continental regions in the reference period (1996-2015). Predicted ripening date, in Julian Days (JD) and calendar dates (within brackets), in the reference time period (1996-2015) for (a) early, (b) mid-early, (c) mid-late and (d) late cultivars. White cells represent those areas that are not suitable for the cultivar production. For each cell ( $8 \times 8$  km<sup>2</sup>), the average value over the considered 20 years is reported.

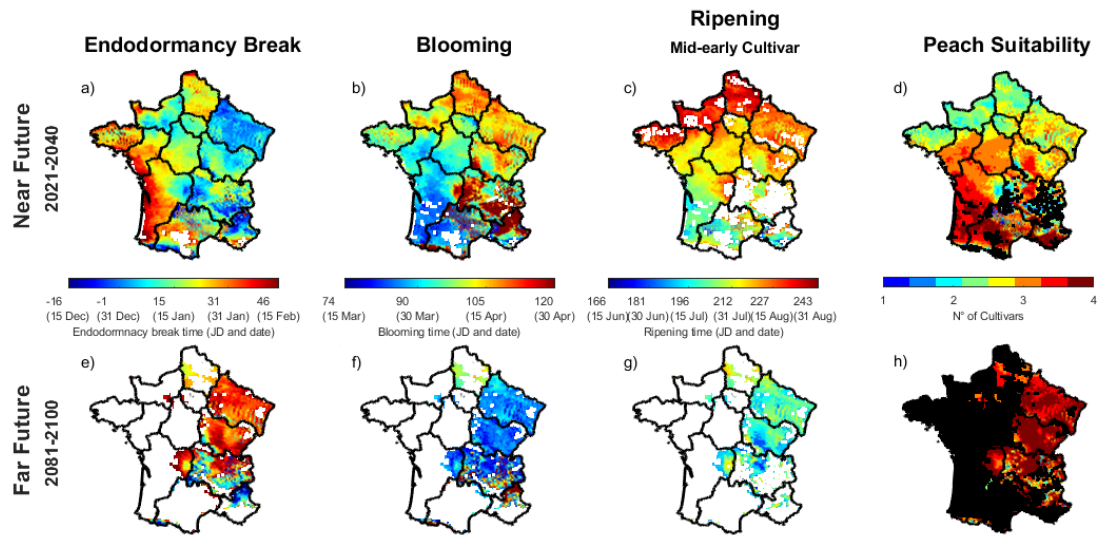

Figure S6: Peach phenological times and thermal niche for cultivation: scenarios forcing our model with RCP 8.5 in the French continental regions for the near (2021-2040, upper panels) and far (2081-2100, lower panels) future. (a,e) Endodormancy break, (b,f) blooming, (c,g) ripening of the mid-early cultivars dates, in Julian Days (JD) and calendar dates (within brackets), and (d,h) peach suitability. For each map cell ( $8 \times 8 \text{ km}^2$ ), the average value over the considered 20 years is reported. White map cells (a-c and e-g) represent those areas where the phenological event did not occur for at least two years. Likewise, black cells (d and h) represent those areas where no peach cultivar could be cultivated for at least two years (out of 20).
